# Supplementary material for: Ion-imprinted guanidine-functionalized zeolite molecular sieves enhance the adsorption selectivity and antibacterial properties for uranium extraction
Source: Royal Society of Chemistry journal article supplement (doi:10.1039/d2ra01651f), 2022-01-01
Supplement: d2ra01651f1.pdf [file d2ra01651f1.pdf]

*Supporting information of*

## **Ion-Imprinted Guanidine-functionalized Zeolite Molecular Sieve Enhances the Adsorption Selectivity and Antibacterial Properties for Uranium Extraction**

Yi Zhao, † Junwen Li, † Sijin Wu, † Haiming Cheng <sup>\*,†,‡</sup>

(<sup>†</sup>Key Laboratory of Leather Chemistry and Engineering of Ministry of Education,  
Sichuan University, Chengdu, 610065;

<sup>‡</sup>National Engineering Laboratory for Clean Technology of Leather Manufacture,  
Sichuan University, Chengdu, 610065)

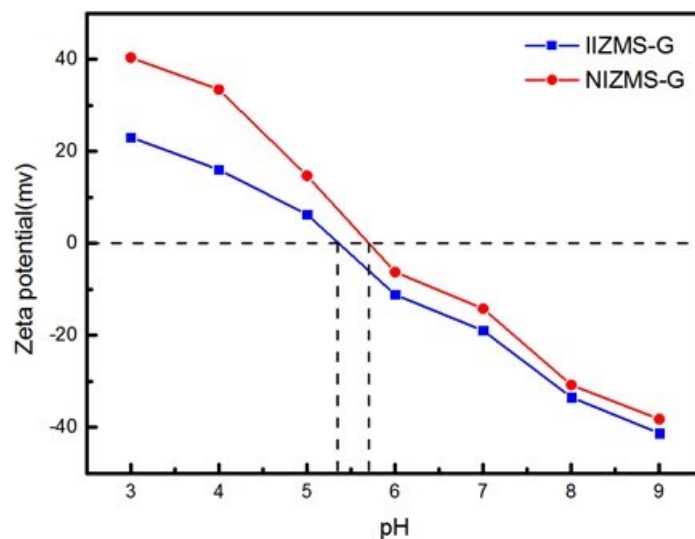

**Figure S1.** Zeta potential tests of IIZMS-G.

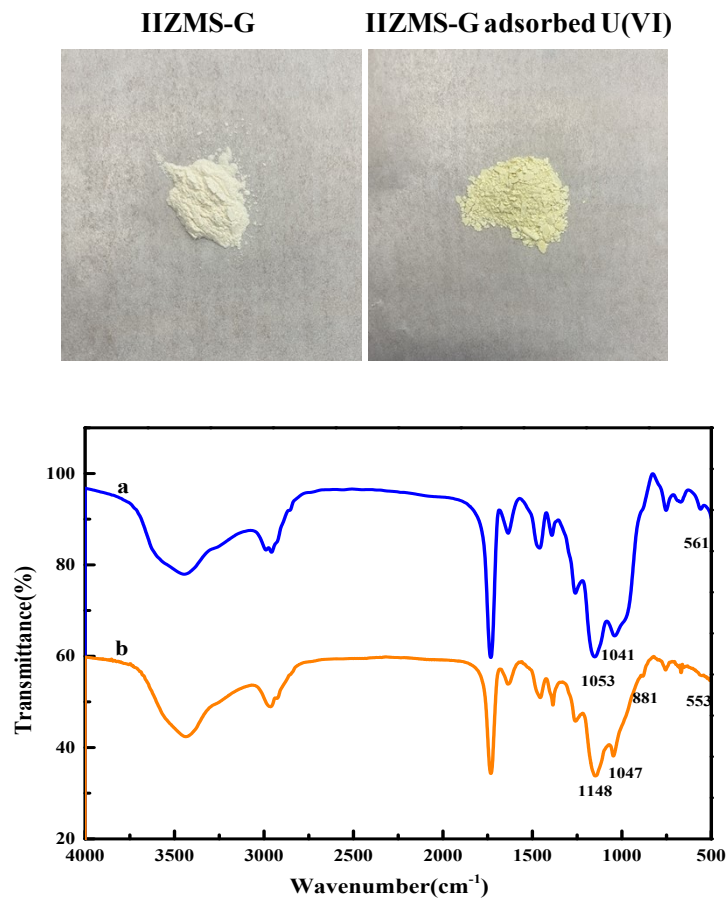

**Figure S2.** Images of the prepared IIZMS-G and IIZMS-G adsorbed of uranium. FT-IR spectra of IIZMS-G before (a) and after (b) adsorption of uranium.

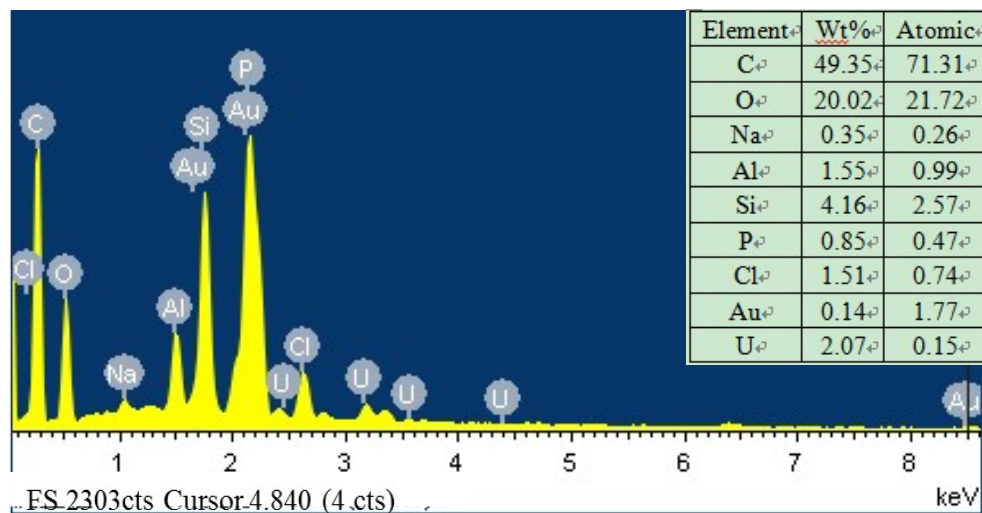

**Figure S3.** The EDS spectrum of IIZMS-G after uranium adsorption.

### Adsorption kinetics

To determine the kinetic of uranium adsorption on IIZMS-G, the kinetics experimental data are simulated by using pseudo-first-order, pseudo-second-order.

The linear form of pseudo-first-order and pseudo-second-order models can be represented by following equations:

$$\frac{1}{qt} = \frac{k_1}{q_e t} + \frac{1}{q_e} \quad (1)$$

$$\frac{t}{q_t} = \frac{1}{k_2 q_e^2} + \frac{1}{q_e} t \quad (2)$$

where  $k_1$  (1/min) and  $k_2$  (mg/(g·min)) are the adsorption rate constants,  $q_e$  and  $q_t$  are the adsorption capacity (mg/g) at equilibrium and time  $t$  (min), respectively.

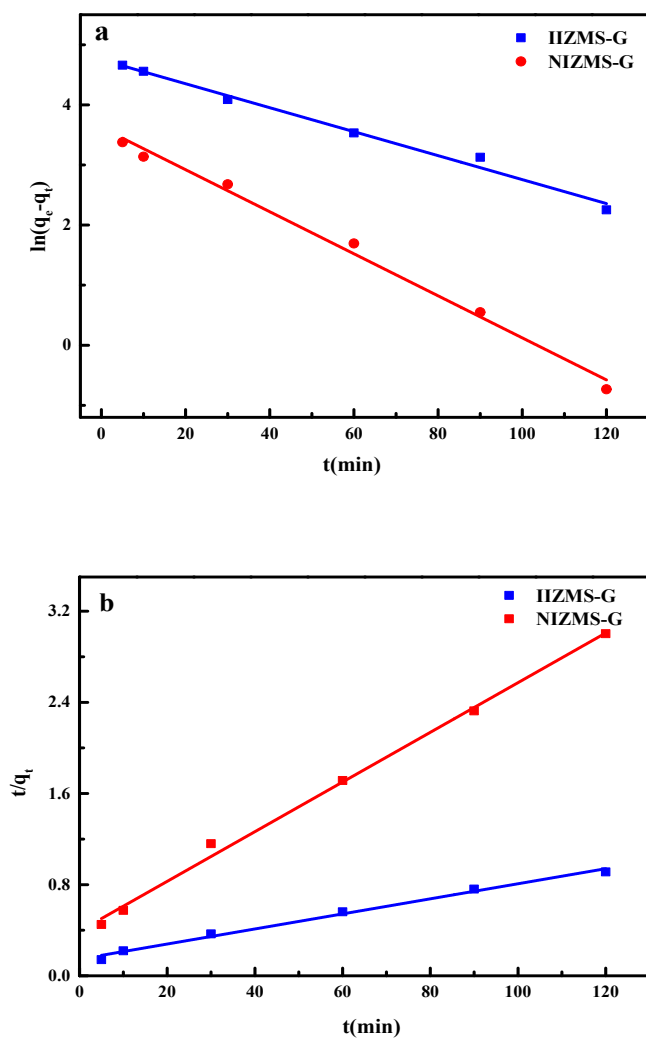

**Figure S4.** (a) pseudo-first-order, (b) pseudo-second-order and model kinetic plots of adsorption U(VI) onto IIZMS-G and NIZMS-G. Conditions: pH = 5.5, T = 20°C, C<sub>0</sub> = 50 mg/L.

---

## Adsorption isotherms

In order to elucidate the nature of the adsorption process and adsorption mechanism, the data is evaluated by two well-designed isotherm models, including Langmuir model and Freundlich model. The equation used for the analysis was given by Eq. (3) and Eq. (4).

$$\frac{c_e}{q_e} = \frac{c_e}{q_m} + \frac{1}{K_L q_m} \quad (3)$$

$$\ln q_e = \ln K_F + \frac{\ln c_e}{n} \quad (4)$$

where  $q_e$ (mg/g) is the amount of U(VI) adsorbed on the surface of IIZMS-G,  $C_e$ (mg/L) is the content of U(VI) present in the solution, and  $q_m$ (mg/g) is the adsorption capacity,  $K_L$ (L/g) is the Freundlich constant,  $K_F$ (mg/g) is the Freundlich constant, and  $n$  is the adsorption intensity.

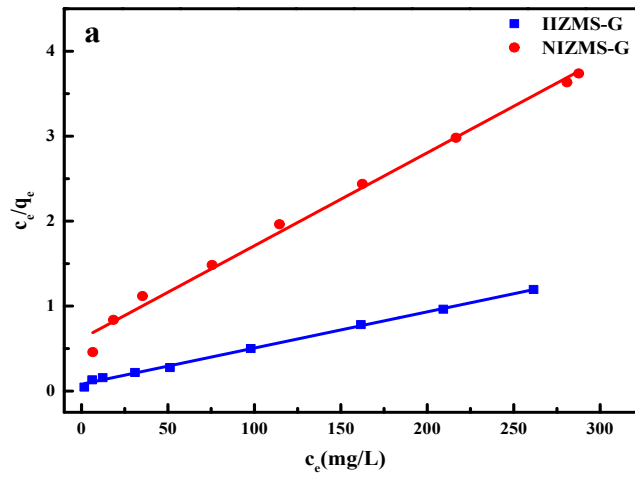

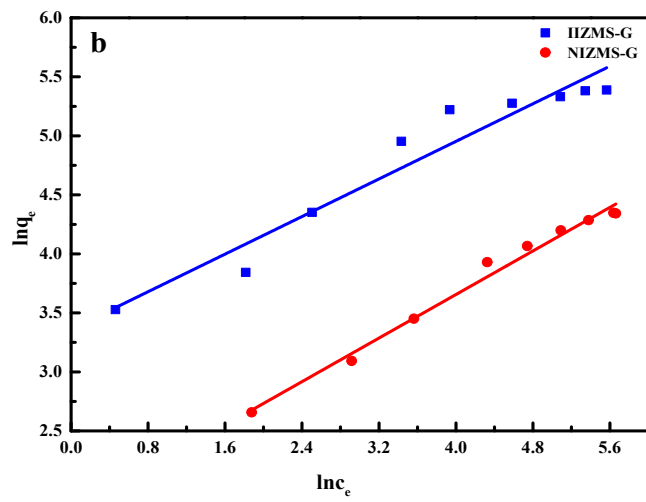

**Figure S5.** Absorption isotherms: (a) Langmuir model; (b) Freundlich model. Conditions: pH = 5.5, T = 20 °C, t = 300 min.
